# Supplementary material for: One-pot crystallization of two 1,4-cyclohexanedicarboxylate-based tetranuclear Cu(ii) compounds and their DNA binding affinities
Source: Royal Society of Chemistry journal article supplement (doi:10.1039/d0ce01734e), 2020-12-11
Supplement: d0ce01734e1.pdf [file d0ce01734e1.pdf]

# One-pot crystallization of 1,4-cyclohexanedicarboxylate based two tetranuclear Cu(II) compounds impacts on DNA binding affinities

Akhtaruzzaman,<sup>a</sup> Mukti Mohammad,<sup>a</sup> Samim Khan,<sup>a</sup> Basudeb Dutta,<sup>a</sup> Suwendu Maity,<sup>b</sup> Sanobar Naaz,<sup>a</sup> Seikh Mafiz Alam,<sup>a</sup> Prasanta Ghosh,<sup>c</sup> Md. Maidul Islam\*,<sup>a</sup> and Mohammad Hedayetullah Mir\*<sup>a</sup>

<sup>a</sup>Department of Chemistry, Aliah University, New Town, Kolkata 700 156, India. Email: [chmmir@gmail.com](mailto:chmmir@gmail.com)

<sup>b</sup>Department of Chemistry, Jadavpur University, Jadavpur, Kolkata 700 032, India.

<sup>c</sup>Department of Chemistry, R. K. M. Residential College, Narendrapur, Kolkata 700 103, India.

## Supporting Information

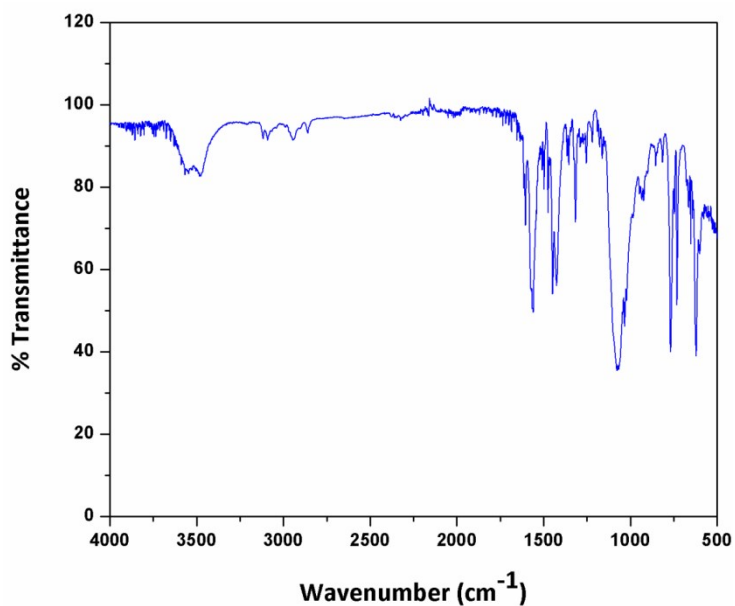

Fig. S1 FT-IR spectrum of compound 1.

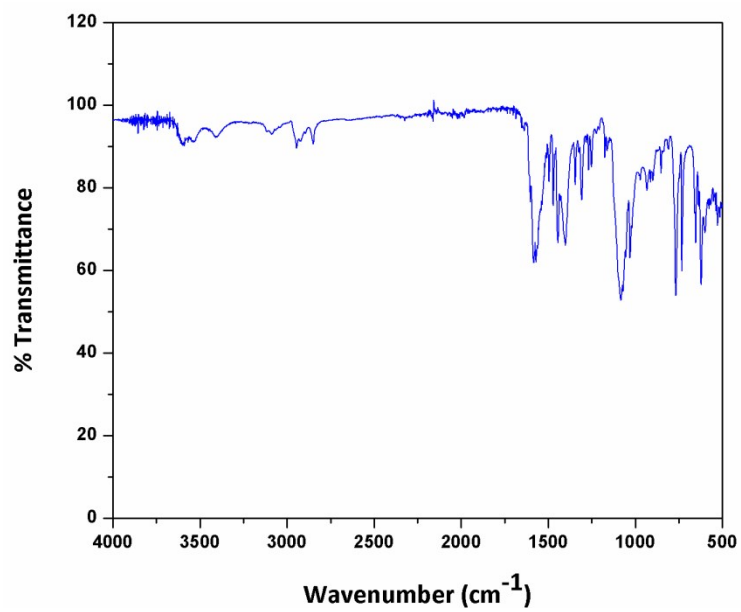

**Fig. S2** FT-IR spectrum of compound **2**.

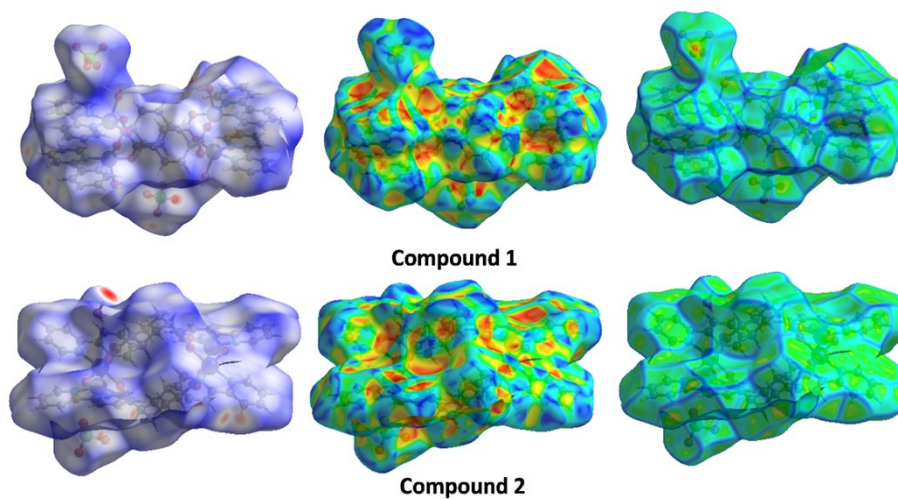

**Fig. S3** Hirshfeld surfaces mapped with *dnorm* (left), shape index (middle), curvedness (right) for compound **1** (above) and **2** (below).

## Density functional study (DFT)

The electronic properties of compound **1** and **2** are determined by performing DFT study. DFT optimizations of the structure of the coordination motifs were explored for the calculation of difference in energy of the HOMO and LUMO (Fig. S4). The HOMO-LUMO gap is calculated as 1.36 eV for compound **1** and 2.09 eV for compound **2**. As the larger difference in the values of HOMO and LUMO points to the lower stability of the resulting molecule, it could be concluded that the compound **1** is more stable in comparison to **2**.

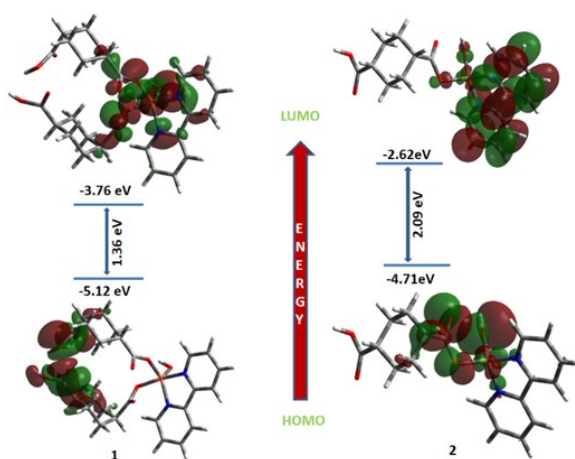

**Fig. S4** DFT computed energy of MOs and the energy difference between HOMO and LUMO of compounds **1** and **2**.

**Table S1** Crystal data and refinement parameters of compound **1** and **2**

| Compound                                                                             | <b>1</b>                                                                                       | <b>2</b>                                                                                      |
|--------------------------------------------------------------------------------------|------------------------------------------------------------------------------------------------|-----------------------------------------------------------------------------------------------|
| Formula                                                                              | C <sub>56</sub> H <sub>56</sub> Cl <sub>4</sub> Cu <sub>4</sub> N <sub>8</sub> O <sub>28</sub> | C <sub>60</sub> H <sub>68</sub> Cu <sub>4</sub> N <sub>8</sub> O <sub>15</sub> S <sub>2</sub> |
| fw                                                                                   | 1685.09                                                                                        | 1486.14                                                                                       |
| crystalsyst                                                                          | Monoclinic                                                                                     | Triclinic                                                                                     |
| space group                                                                          | <i>P2<sub>1</sub>/n</i>                                                                        | <i>p</i> $\bar{1}$                                                                            |
| <i>a</i> (Å)                                                                         | 9.5466(3)                                                                                      | 9.3595(3)                                                                                     |
| <i>b</i> (Å)                                                                         | 17.6942(6)                                                                                     | 12.4592(4)                                                                                    |
| <i>c</i> (Å)                                                                         | 20.2248(7)                                                                                     | 14.5015(4)                                                                                    |
| $\alpha$ (deg)                                                                       | 90                                                                                             | 87.821(1)                                                                                     |
| $\beta$ (deg)                                                                        | 101.200(2)                                                                                     | 72.827(1)                                                                                     |
| $\gamma$ (deg)                                                                       | 90                                                                                             | 68.258(1)                                                                                     |
| <i>V</i> (Å <sup>3</sup> )                                                           | 3351.3(2)                                                                                      | 1495.86(8)                                                                                    |
| <i>Z</i>                                                                             | 2                                                                                              | 1                                                                                             |
| <i>D</i> <sub>calcd</sub> (g/cm <sup>3</sup> )                                       | 1.670                                                                                          | 1.650                                                                                         |
| $\mu$ (mm <sup>-1</sup> )                                                            | 1.503                                                                                          | 1.575                                                                                         |
| $\lambda$ (Å)                                                                        | 0.71073                                                                                        | 0.71073                                                                                       |
| GOF on <i>F</i> <sup>2</sup>                                                         | 1.052                                                                                          | 1.047                                                                                         |
| data[ <i>I</i> >2 $\sigma$ ( <i>I</i> )]/params                                      | 8321/453                                                                                       | 7353/412                                                                                      |
| final <i>R</i> indices<br>[ <i>I</i> >2 $\sigma$ ( <i>I</i> )] <sup><i>a,b</i></sup> | <i>R</i> 1 = 0.0533<br><i>wR</i> 2 = 0.1787                                                    | <i>R</i> 1 = 0.0463<br><i>wR</i> 2 = 0.1356                                                   |

$${}^a R1 = \sum ||F_o| - |F_c|| / \sum |F_o|, {}^b wR2 = [\sum w(F_o^2 - F_c^2)^2 / \sum w(F_o^2)^2]^{1/2}$$

**Table S2** Selected bond lengths (Å) in **1** and **2**.

| <b>1</b>    | (Å)      | <b>2</b>    | (Å)      |
|-------------|----------|-------------|----------|
| Cu(1)-O(2)  | 2.252(3) | Cu(1)-O(2)  | 1.987(3) |
| Cu(1)-O(3)  | 1.944(3) | Cu(1)-O(5)  | 1.924(3) |
| Cu(1)-N(1)  | 1.996(3) | Cu(1)-N(1)  | 2.010(3) |
| Cu(1)-N(2)  | 1.998(3) | Cu(1)-N(2)  | 2.033(3) |
| Cu(1)-O(6)a | 1.926(3) | Cu(1)-O(3)a | 2.161(3) |
| Cu(2)-O(1)  | 2.236(4) | Cu(2)-O(1)  | 1.961(3) |
| Cu(2)-O(4)  | 1.938(3) | Cu(2)-O(5)  | 1.933(2) |
| Cu(2)-N(3)  | 2.001(3) | Cu(2)-N(3)  | 2.030(3) |
| Cu(2)-N(4)  | 2.009(3) | Cu(2)-N(4)  | 2.023(2) |
| Cu(2)-O(5)a | 1.950(3) | Cu(2)-O(4)a | 2.163(3) |

Symmetry transformations used to generate equivalent atoms: a = 1-x,1-y,1-z.

**Table S3** Selected bond angles (°) in **1**.

|                  |            |                  |            |
|------------------|------------|------------------|------------|
| O(2)-Cu(1)-O(3)  | 92.12(13)  | O(1)-Cu(2)-O(4)  | 90.13(13)  |
| O(2)-Cu(1)-N(1)  | 95.41(13)  | O(1)-Cu(2)-N(3)  | 98.57(13)  |
| O(2)-Cu(1)-N(2)  | 93.87(12)  | O(1)-Cu(2)-N(4)  | 96.79(13)  |
| O(2)-Cu(1)-O(6)a | 93.64(13)  | O(1)-Cu(2)-O(5)a | 94.67(12)  |
| O(3)-Cu(1)-N(1)  | 171.49(12) | O(4)-Cu(2)-N(3)  | 169.21(13) |
| O(3)-Cu(1)-N(2)  | 94.31(12)  | O(4)-Cu(2)-N(4)  | 91.91(13)  |
| O(3)-Cu(1)-O(6)a | 91.11(12)  | O(4)-Cu(2)-O(5)a | 91.92(13)  |
| N(1)-Cu(1)-N(2)  | 81.23(12)  | N(3)-Cu(2)-N(4)  | 80.78(13)  |
| O(6)a-Cu(1)-N(1) | 92.38(12)  | O(5)a-Cu(2)-N(3) | 93.71(13)  |
| O(6)a-Cu(1)-N(2) | 170.57(13) | O(5)a-Cu(2)-N(4) | 167.90(12) |

Symmetry transformations used to generate equivalent atoms: a = 1-x,1-y,1-z.

**Table S4** Selected bond angles (°) in **2**.

|                  |            |                  |            |
|------------------|------------|------------------|------------|
| O(2)-Cu(1)-O(5)  | 93.83(11)  | O(1)-Cu(2)-O(5)  | 93.27(10)  |
| O(2)-Cu(1)-N(1)  | 89.60(11)  | O(1)-Cu(2)-N(3)  | 90.49(11)  |
| O(2)-Cu(1)-N(2)  | 151.19(10) | O(1)-Cu(2)-N(4)  | 161.47(12) |
| O(2)-Cu(1)-O(3)a | 93.25(10)  | O(1)-Cu(2)-O(4)a | 97.40(10)  |
| O(5)-Cu(1)-N(1)  | 169.92(10) | O(5)-Cu(2)-N(3)  | 163.62(11) |
| O(5)-Cu(1)-N(2)  | 92.60(11)  | O(5)-Cu(2)-N(4)  | 92.21(10)  |
| O(3)a-Cu(1)-O(5) | 101.87(10) | O(4)a-Cu(2)-O(5) | 103.27(11) |
| N(1)-Cu(1)-N(2)  | 79.98(11)  | N(3)-Cu(2)-N(4)  | 79.58(11)  |
| O(3)a-Cu(1)-N(1) | 87.38(10)  | O(4)a-Cu(2)-N(3) | 92.03(10)  |
| O(3)a-Cu(1)-N(2) | 112.82(11) | O(4)a-Cu(2)-N(4) | 98.54(10)  |

Symmetry transformations used to generate equivalent atoms: a = 1-x,1-y,1-z.

**Table S5** Hydrogen bonding in compounds **1** and **2**

| Compound | D—H···A                  | Distance (Å)<br>D—H | Distance (Å)<br>H···A | Distance (Å)<br>D···A | Angle (°)<br>∠D—H···A | Symmetry           |
|----------|--------------------------|---------------------|-----------------------|-----------------------|-----------------------|--------------------|
| <b>1</b> | O(2)-H(2)···(O7)         | 0.8200              | 2.1000                | 2.826(8)              | 148.00                | -                  |
| <b>2</b> | O(1AA)-<br>H(1AA)···(O7) | 0.86(8)             | 1.96(8)               | 2.804(9)              | 168(5)                | r = 1+x,<br>-1+y,z |
| <b>2</b> | O(1AA)-<br>H(1AB)···(O4) | 0.87(9)             | 2.14(9)               | 2.823(6)              | 136(11)               |                    |

**Table S6** IR spectral data of compounds **1** and **2**

| Compound | $\nu_{\text{OH}}$ | $\nu_{\text{as}}(\text{COO}^-)$ | $\nu_{\text{sys}}(\text{COO}^-)$ | $\Delta\nu$ |
|----------|-------------------|---------------------------------|----------------------------------|-------------|
| <b>1</b> | 3482              | 1561                            | 1449                             | 112         |
| <b>2</b> | 3475              | 1580                            | 1446                             | 134         |

**Table S7** Docking score of **1**-DNA interaction

| $\Delta\text{G}$ (kcal/mole) | rmsd      | $\Delta\text{G}_{\text{conf}}$ (kcal/mole) |
|------------------------------|-----------|--------------------------------------------|
| 11.174747                    | 11.14868  | 0                                          |
| 10.903216                    | 11.098319 | 0                                          |
| -4.0406713                   | 9.287714  | 0.40000001                                 |
| -9.2726345                   | 7.2024074 | 0.40000001                                 |
| -8.6024942                   | 4.8537669 | 0.40000001                                 |

**Table S8** Docking score of **2**-DNA interaction

| $\Delta\text{G}$ (kcal/mole) | rmsd      | $\Delta\text{G}_{\text{conf}}$ (kcal/mole) |
|------------------------------|-----------|--------------------------------------------|
| 10.702652                    | 10.31814  | 0.39150268                                 |
| -2.0227284                   | 9.0111036 | 0.39150268                                 |
| -6.5041547                   | 6.7488694 | 0.39150268                                 |
| -1.5231411                   | 4.7725468 | 0.0029858467                               |
| -0.22762701                  | 4.7634172 | 0.036107246                                |
| -1.2192179                   | 4.7353959 | 0.16538859                                 |
| 0.025211502                  | 4.7312188 | 0.34162697                                 |
| 0.13292329                   | 4.7168374 | 0.49440539                                 |
| -5.1104512                   | 3.5182025 | 0.14538859                                 |

**Table S9** Molecular descriptors of DNA, compounds and DNA bound compounds

| <b>Name</b>         | <b>SASA<br/>(<math>\text{\AA}^2</math>)</b> | <b>ASA+<br/>(<math>\text{\AA}^2</math>)</b> | <b>ASA-<br/>(<math>\text{\AA}^2</math>)</b> | <b>ASA_H<br/>(<math>\text{\AA}^2</math>)</b> | <b><math>\Delta</math>SASA<br/>(<math>\text{\AA}^2</math>)</b> | <b><math>\Delta</math>G<br/>kcal/mole</b> | <b><math>\Delta</math>G<sub>con</sub><br/>kcal/mole</b> | <b><math>\Delta</math>G<sub>hyd</sub><br/>kcal/mole</b> |
|---------------------|---------------------------------------------|---------------------------------------------|---------------------------------------------|----------------------------------------------|----------------------------------------------------------------|-------------------------------------------|---------------------------------------------------------|---------------------------------------------------------|
| <b>Free<br/>DNA</b> | 4754.21                                     | 1188.67                                     | 2051.83                                     | 1957.09                                      |                                                                |                                           |                                                         |                                                         |
| <b>1</b>            | 765.23                                      | 352.95                                      | 267.04                                      | 596.27                                       |                                                                |                                           |                                                         |                                                         |
| <b>1-DNA</b>        | 4934.2                                      | 2738.01                                     | 2196.19                                     | 2379.72                                      | 585.24                                                         | -8.60                                     | 0.4                                                     | -12.87                                                  |
| <b>2</b>            | 763.87                                      | 306.87                                      | 334.42                                      | 645.11                                       |                                                                |                                           |                                                         |                                                         |
| <b>2-DNA</b>        | 4961.09                                     | 2716.38                                     | 2244.71                                     | 2445.23                                      | 562.99                                                         | -5.11                                     | 0.14                                                    | -12.38                                                  |
